# Supplementary material
Source: PubMed Central journal article supplement (PMC2678424)
Supplement: 0902636106_0902636106SI.pdf [file 0902636106_0902636106SI.pdf]

# Supporting Information

O'Connell et al. 10.1073/pnas.0902636106

Table S1. Primers and oligonucleotides

| Name                           | Sequence                                                                                        |
|--------------------------------|-------------------------------------------------------------------------------------------------|
| m155 from LPS BMM Fw           | AAACCAGGAAGGGGAAGTGT                                                                            |
| m155 from LPS BMM Rev          | ATCCAGCAGGGTGACTCTTG                                                                            |
| h155 BlockiT Template oligo    | GAAGGCTGTATGCTGTTAATGCTAATCGTGATAGGGGTTTTGGCC<br>ACTGACTGACCCCTATCAATTAGCATTAAACAGGACACAAGGCCTG |
| h155mut BlockiT Template oligo | GAAGGCTGTATGCTGTATTACGTAATCGTGATAGGGGTTTTGGCC<br>ACTGACTGACCCCTATCAATTACGTAATACAGGACACAAGGCCTG  |
| siShip1 BlockiT Template oligo | GAAGGCTGTATGCTGTTAAATGTCATGCTGGTGACTGTTTTGGCC<br>ACTGACTGACAGTCACCAATGACATTTAACAGGACACAAGGCCTG  |
| m155 arms NotI Fw              | ATCGGCTGAGTCGACGCGGCCGCTGGAGGCTTGCTGAAGGCT<br>GTATGCTG                                          |
| m155 arms XhoI Rev             | ATCGCAATTGCTCGAGTGGGCCATTTGTTCCATGTGAGTGCTAGT<br>AACAGGCCTTGTGTC                                |
| mShip1 3'UTR SpeI Fw           | TTCACTAGTGCTGCTGGTGATCGGAGCCTG                                                                  |
| mShip1 3'UTR HindIII Rev       | TTCAAGCTTTAGAAAGGCACAATTTTATTGGTCACTCAG                                                         |
| mShip1 UTRmut fragment 1 Rev   | GGTTAGCTAAGAGACCGATGGTTTTCTTATTACGTTTTTAAAAA<br>CATCTCAGGACCCACC                                |
| mShip1 UTRmut fragment 2 Fw    | GTGGGTCCTGAGATGTTTTTAAAAACGTAATAAGAAAACCATCGG<br>TCTCTTAGAGCTAACC                               |
| Bic qPCR Fw                    | AAACCAGGAAGGGGAAGTGT                                                                            |
| Bic qPCR Rev                   | ATCCAGCAGGGTGACTCTTG                                                                            |
| mSHIP1 qPCR Fw1                | CCAGGGCAAGATGAGGGAGA                                                                            |
| mSHIP1 qPCR Rev1               | GGACCTCGGTTGGCAATGTA                                                                            |
| mSHIP1 qPCR Fw2                | GAGCGGATGAATCCAGTGG                                                                             |
| mSHIP1 qPCR Rev2               | GGACCTCGGTTGGCAATGTA                                                                            |
| mL32 qPCR Fw                   | AAGCGAACTGGCGGAAAC                                                                              |
| mL32 qPCR Rev                  | TAACCGATGTTGGGCATCAG                                                                            |
| h155mut Northern probe         | CCCCTATCACGATTACGTAATA                                                                          |
